# Supplementary material for: Racial Disparities in Obesity‐Related Cardiovascular Mortality in the United States: Temporal Trends From 1999 to 2020
Source: PubMed Central journal article supplement (PMC10547286; doi:10.1161/jaha.122.028409), 2023-09-06

# **SUPPLEMENTAL MATERIAL**

**Figure S1. Crude rate of obesity-related cardiovascular mortality, stratified by age and ethnicity.**

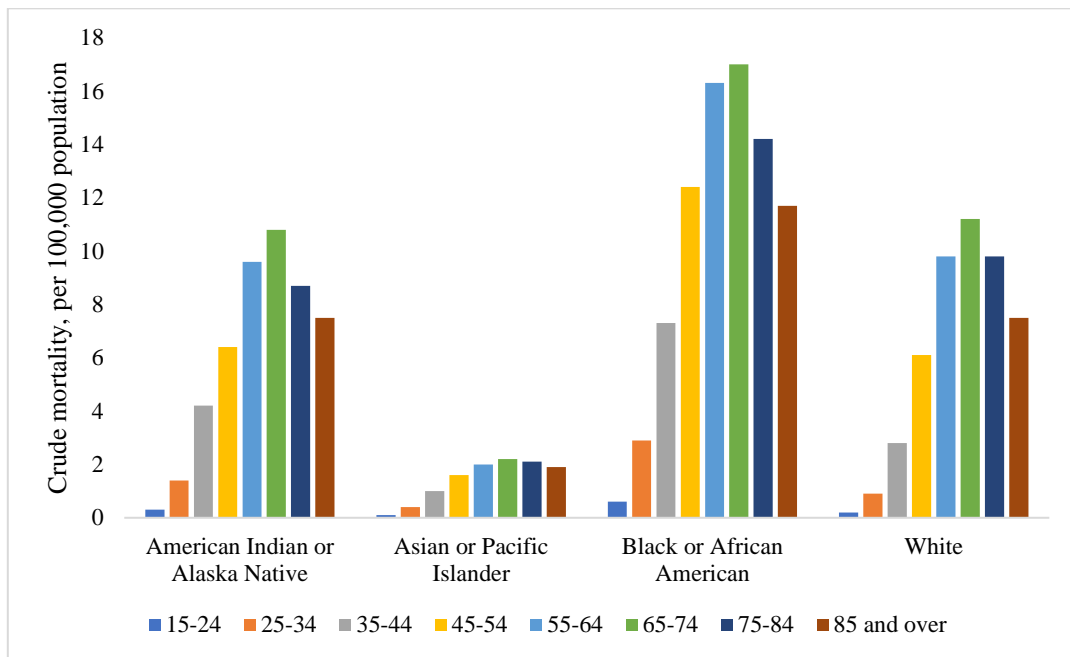

Supplement: JAH3-12-e028409-s001.pdf [file JAH3-12-e028409-s001.pdf]
